# Supplementary material for: Integrating Problem-Based Learning and Artificial Intelligence in Neurology Education
Source: Research Square preprint supplement (doi:10.21203/rs.3.rs-6520952/v1), 2025-06-03
Supplement: Supplementary file 1 [file 57c20b36693d10c9096b5164.docx]

****AI Lumbar Puncture System Application Evaluation Form****

1. **Did the AI-3D lumbar puncture training enhance your learning interest?**

**_____%**

1. **Do you think the system can improve clinical procedural proficiency?**

**_____%**

1. **To what extent do you think the system could optimize lumbar puncture performance?**

**_____%**
